# Supplementary material for: Obtaining long 16S rDNA sequences using multiple primers and its application on dioxin-containing samples
Source: PubMed Central journal article supplement (PMC4682383; doi:10.1186/1471-2105-16-s18-s13), 2015-12-09
Supplement: 1471-2105-16-S18-S13-S1.pdf [file 1471-2105-16-S18-S13-S1.pdf]

## Additonal file 1

### Supplementary Tables

| Sample | DNA concentration | 260/280nm         |
|--------|-------------------|-------------------|
| S1     | 64.5 ng/μl        | 1.29/0.671 (1.92) |
| S2     | 67.5 ng/μl        | 1.358/0.75 (1.81) |
| S3     | 36.2 ng/μl        | 0.724/0.201 (3.6) |
| S4     | 52.2ng/μl         | 1.044/0.2 (5.2)   |
| S5     | 11.2ng/μl         | 0.224/0.056 (4)   |
| S6     | 75.9ng/μl         | 1.518/0.474 (3.2) |
| S7     | 91.1ng/μl         | 1.822/0.56 (3.25) |
| S8     | 33.3ng/μl         | 0.666/0.214 (3.1) |
| S9     | 67ng/μl           | 1.34/0.536 (2.5)  |
| S10    | 67ng/μl           | 1.34/0.609 (2.2)  |

Table S1. DNA concentrations and quality controls of ten samples.

|                               |                                 |
|-------------------------------|---------------------------------|
| <i>Legionella pneumophila</i> |                                 |
| 70F                           | GTCTAGCTTGCTAGACAGATGGCGA       |
| 1251R                         | CGGCGAAGGGGCGACCTGGAGCAAATC     |
| <i>Chryseobacterium</i>       |                                 |
| 66F                           | AGATCTTTCGGGATCTT               |
| 1235R                         | TACACAGCGATGTGATGCAAATCTCGAAAG  |
| <i>Pseudomonas</i>            |                                 |
| 47F                           | AAGTCGAGCGGATGACGGGAGCTTGCTCCTT |
| 1251R                         | GAGGTGGAGCTAATCTCACAAAACCG      |

Table S2. Additional primers for amplifying full-length 16S rDNA of three known bacteria.

| Genus                   | A     | B    | C     | D     | E    | F     |
|-------------------------|-------|------|-------|-------|------|-------|
| <i>Legionella</i>       | 10.5% | 3.1% | 38.3% | 21.4% | 7.0% | 19.7% |
| <i>Pseudomonas</i>      | 19.5% | 5.1% | 18.0% | 17.5% | 5.7% | 34.2% |
| <i>Chryseobacterium</i> | 18.9% | 6.5% | 34.0% | 33.7% | 6.7% | 0.1%  |

|                 |      |      |       |      |      |       |
|-----------------|------|------|-------|------|------|-------|
| <i>Bacillus</i> | 5.0% | 6.5% | 34.2% | 9.2% | 4.1% | 41.0% |
|-----------------|------|------|-------|------|------|-------|

Table S3. Percentages of confident reads amplified by six primers (A-F) for four known bacteria in sample S1.

| Genus\sample                      | S4    | S5    | S6  | S7    | S8    | S9  | S10   |
|-----------------------------------|-------|-------|-----|-------|-------|-----|-------|
| <i>Candidatus_Nitrosoarchaeum</i> | 10.32 | 1.46  | 0   | 0.17  | 1.32  | 0   | 0     |
| <i>Nitrosopumilus</i>             | 10.32 | 1.46  | 0   | 0.17  | 1.32  | 0   | 0     |
| <i>Nitrososphaera</i>             | 0     | 0     | 0   | 0     | 1.75  | 0   | 1.28  |
| <i>Methanosarcina</i>             | 0     | 0     | 0   | 0     | 0.44  | 0   | 0     |
| <i>Methanolobus</i>               | 0     | 0     | 0   | 0     | 0.44  | 0   | 0     |
| <i>Halolamina</i>                 | 0     | 0.24  | 0   | 0     | 0     | 0   | 0     |
| <i>Halogranum</i>                 | 0.13  | 0     | 0   | 0     | 0     | 0   | 0     |
| <i>Haloferax</i>                  | 0.13  | 0     | 0   | 0     | 0     | 0   | 0     |
| <i>Halopelagius</i>               | 0.13  | 0     | 0   | 0     | 0     | 0   | 0     |
| <i>Natronomonas</i>               | 0.13  | 0     | 0   | 0     | 0     | 0   | 0     |
| unclassified                      | 78.84 | 96.84 | 100 | 99.67 | 94.74 | 100 | 98.72 |

Table S4. Percentages of archaea genera (relative to all archaea reads) in real samples.
